# Supplementary material for: Promoting Low-Risk Fire Regimes: An Agent-Based Model to Explore Wildfire Mitigation Policy Options
Source: MDPI journal article supplement (doi:10.3390/fire6030102), 2023-03-06

## Supplementary information

for

### *Promoting low-risk fire regimes: an agent-based model to explore wildfire mitigation policy options*

Paulo Flores Ribeiro\*, Francisco Moreira, Maria João Canadas, Ana Novais, Miguel Leal, Sandra Oliveira, Rafaello Bergonse, José Luís Zêzere, José Lima Santos

\* Corresponding author (pfribeiro@isa.ulisboa.pt)

**Figure S1** - Land use / land cover (LUC) simulations in each policy scenario in the study area of Pinhal Interior. Monetary values refer to payments to landowners provided by a hypothetical LUC policy

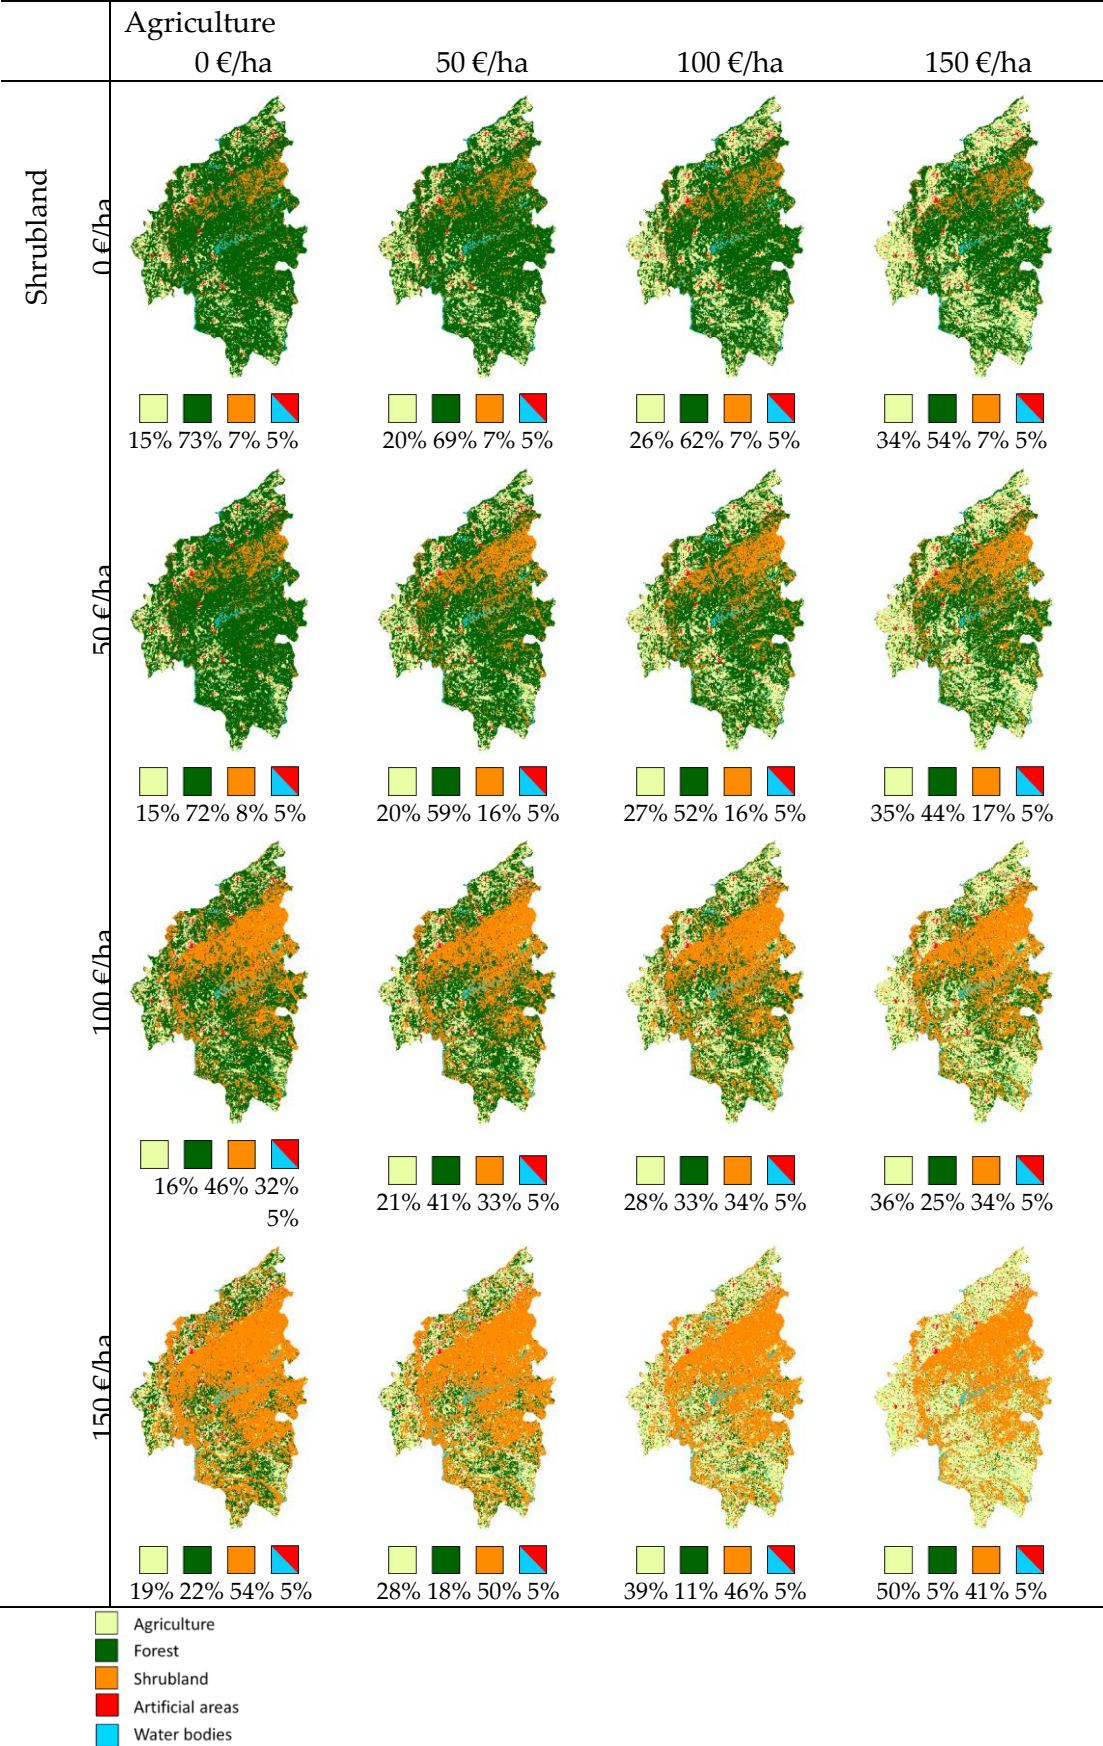

Supplement: s1 [file s1]
